# Supplementary material
Source: PubMed Central journal article supplement (PMC3105270)
Supplement: supp_kwq368_Web_Table_1.pdf [file supp_kwq368_Web_Table_1.pdf]

Web Table 1. Associations of Risk Factors with All-Cause Mortality from Cox Proportional Hazards Model Among 50,112 Participants in the Nurses' Health Study, Stratified by Time Period (1986-1996 and 1996-2004)

|                                                          | 1986-1996 (no. deaths = 1521) |              | 1996-2004 (no. deaths = 3372) |              | P for interaction |
|----------------------------------------------------------|-------------------------------|--------------|-------------------------------|--------------|-------------------|
|                                                          | HR <sup>a</sup>               | 95% CI       | HR <sup>a</sup>               | 95% CI       |                   |
| Age (per 19 yrs) <sup>b</sup>                            | 4.43                          | (3.50, 5.62) | 6.55                          | (5.57, 7.70) | 0.0002            |
| BMI at age 18 (per 7 kg/m <sup>2</sup> ) <sup>c</sup>    | 1.21                          | (1.08, 1.37) | 1.24                          | (1.14, 1.34) | 0.97              |
| Weight change since age 18 (per 23 kg) <sup>c</sup>      | 1.04                          | (0.92, 1.17) | 1.10                          | (1.01, 1.19) | 0.07              |
| Height (per 6 in) <sup>d</sup>                           | 1.03                          | (0.90, 1.16) | 1.22                          | (1.12, 1.33) | 0.05              |
| Smoking status <sup>b</sup>                              |                               |              |                               |              |                   |
| Never                                                    | 1.0 (ref)                     |              | 1.0 (ref)                     |              | } 0.49            |
| Past                                                     | 0.92                          | (0.79, 1.07) | 0.98                          | (0.89, 1.08) |                   |
| Current                                                  | 1.33                          | (1.11, 1.60) | 1.57                          | (1.38, 1.77) |                   |
| Smoking amount/duration (per 46 pack-years) <sup>b</sup> | 2.37                          | (2.06, 2.72) | 1.95                          | (1.76, 2.15) | 0.07              |
| Physical activity (per 33 MET-hrs/wk) <sup>b</sup>       | 0.84                          | (0.74, 0.96) | 0.88                          | (0.81, 0.95) | 0.47              |
| Alcohol intake (g/day) <sup>b</sup>                      |                               |              |                               |              |                   |
| None                                                     | 1.0 (ref)                     |              | 1.0 (ref)                     |              | } 0.05            |
| 0.1-9.9                                                  | 0.80                          | (0.70, 0.90) | 0.94                          | (0.87, 1.02) |                   |
| 10-29.9                                                  | 0.93                          | (0.79, 1.09) | 0.90                          | (0.81, 1.01) |                   |
| ≥ 30                                                     | 0.87                          | (0.69, 1.10) | 1.11                          | (0.95, 1.30) |                   |
| Nut consumption (servings/wk) <sup>b</sup>               |                               |              |                               |              |                   |
| None                                                     | 1.0 (ref)                     |              |                               |              | } 0.41            |
| ≤ 1                                                      | 0.93                          | (0.83, 1.03) | 0.92                          | (0.86, 0.99) |                   |
| ≥ 2                                                      | 0.78                          | (0.64, 0.95) | 0.89                          | (0.78, 1.00) |                   |
| Polyunsaturated fat (per 3% energy) <sup>e</sup>         | 0.80                          | (0.70, 0.91) | 0.87                          | (0.80, 0.95) | 0.28              |
| Glycemic load (per 41 units) <sup>e</sup>                | 1.19                          | (1.01, 1.39) | 1.25                          | (1.12, 1.39) | 0.52              |
| Dietary cholesterol (per 105 mg/1000 kcal) <sup>e</sup>  | 1.10                          | (0.96, 1.25) | 1.20                          | (1.10, 1.31) | 0.55              |
| Cereal fiber (per 4 g, energy-adjusted) <sup>e</sup>     | 0.73                          | (0.63, 0.84) | 0.89                          | (0.81, 0.97) | 0.004             |
| Systolic blood pressure <sup>b</sup>                     |                               |              |                               |              |                   |
| < 120                                                    | 1.0 (ref)                     |              | 1.0 (ref)                     |              | } 0.05            |
| 120-139                                                  | 1.02                          | (0.90, 1.15) | 1.02                          | (0.94, 1.11) |                   |
| 140-149                                                  | 1.13                          | (0.96, 1.33) | 1.26                          | (1.14, 1.40) |                   |
| 150-159                                                  | 1.64                          | (1.30, 2.06) | 1.28                          | (1.08, 1.51) |                   |
| ≥ 160                                                    | 1.68                          | (1.26, 2.26) | 1.43                          | (1.15, 1.77) |                   |
| Use of blood pressure medications <sup>f</sup>           | 1.01                          | (0.88, 1.16) | 1.27                          | (1.16, 1.39) | 0.001             |
| Personal history of diabetes <sup>g</sup>                | 2.17                          | (1.76, 2.69) | 2.63                          | (2.29, 3.03) | 0.05              |
| Parental MI before age 60 <sup>g</sup>                   | 1.12                          | (0.98, 1.27) | 1.14                          | (1.05, 1.24) | 0.77              |
| Time since menopause (per 13 yr) <sup>b</sup>            | 1.16                          | (1.00, 1.36) | 1.15                          | (1.03, 1.27) | 0.01              |

Abbreviations: HR, hazard ratio; CI, confidence interval; BMI, body mass index; MET, metabolic equivalent; MI, myocardial infarction

Note: Units for continuous variables correspond to the difference between the 90<sup>th</sup> and 10<sup>th</sup> percentile values

<sup>a</sup> Adjusted for all other risk factors in table

<sup>b</sup> From 1986 questionnaire

<sup>c</sup> From 1980 questionnaire

<sup>d</sup> From 1976 questionnaire

<sup>e</sup> Average of values from 1980, 1984, and 1986 questionnaires

<sup>f</sup> From 1988 questionnaire

<sup>g</sup> From 1986 or previous questionnaires
